# Supplementary material
Source: PubMed Central journal article supplement (PMC3798851)

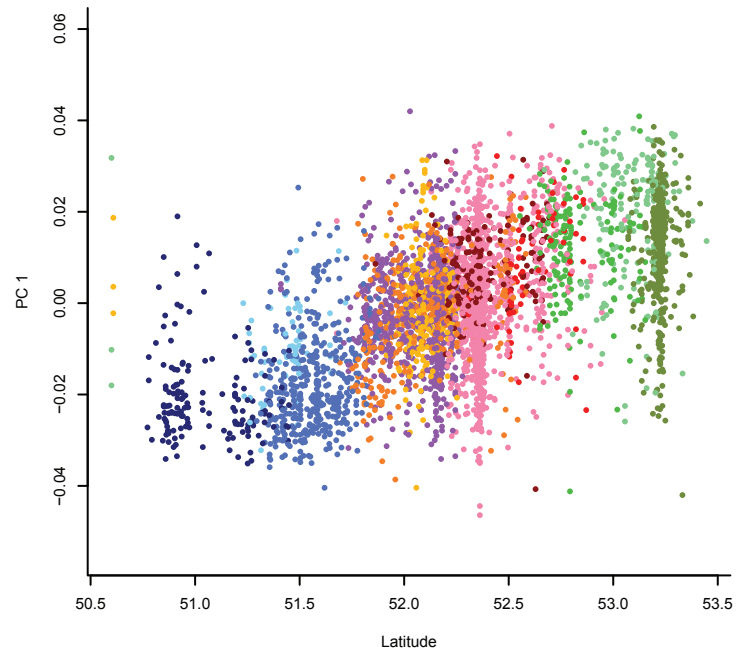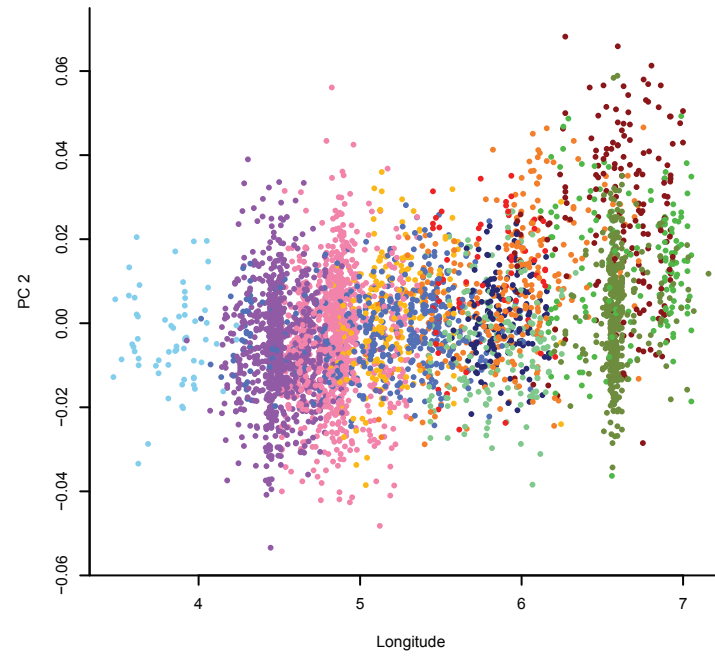

- Noord-Holland
- Zuid-Holland
- Zeeland
- Utrecht
- Noord-Brabant
- Limburg
- Gelderland
- Overijssel
- Flevoland
- Friesland
- Drenthe
- Groningen

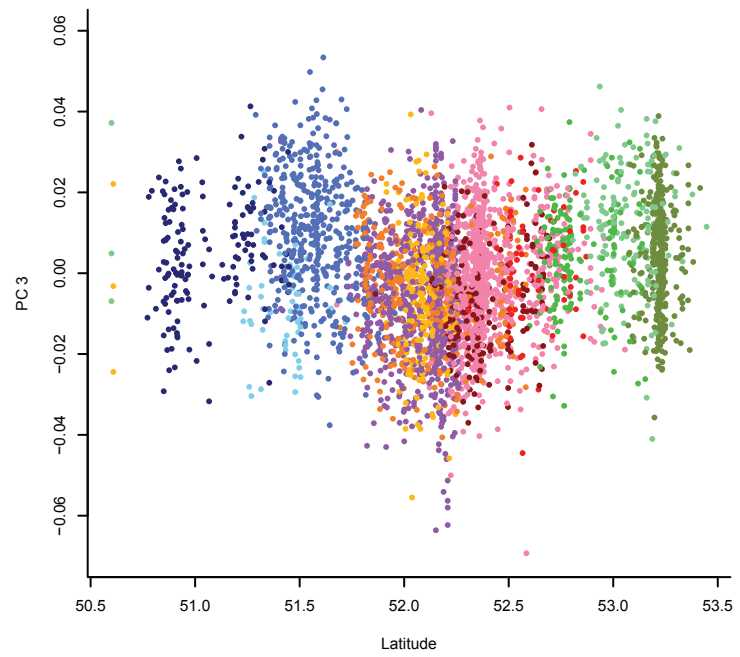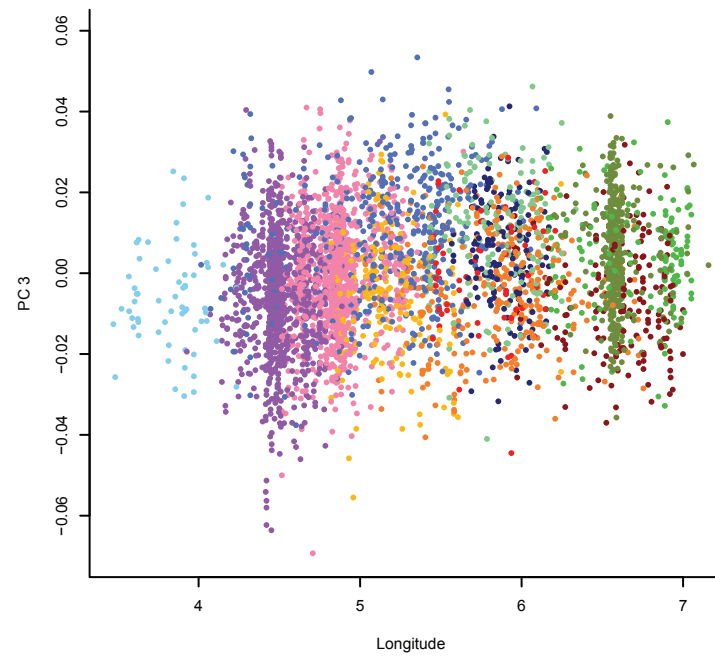

Supplement: ejhg201348x6.pdf [file ejhg201348x6.pdf]
