# Supplementary material
Source: PubMed Central journal article supplement (PMC3798851)

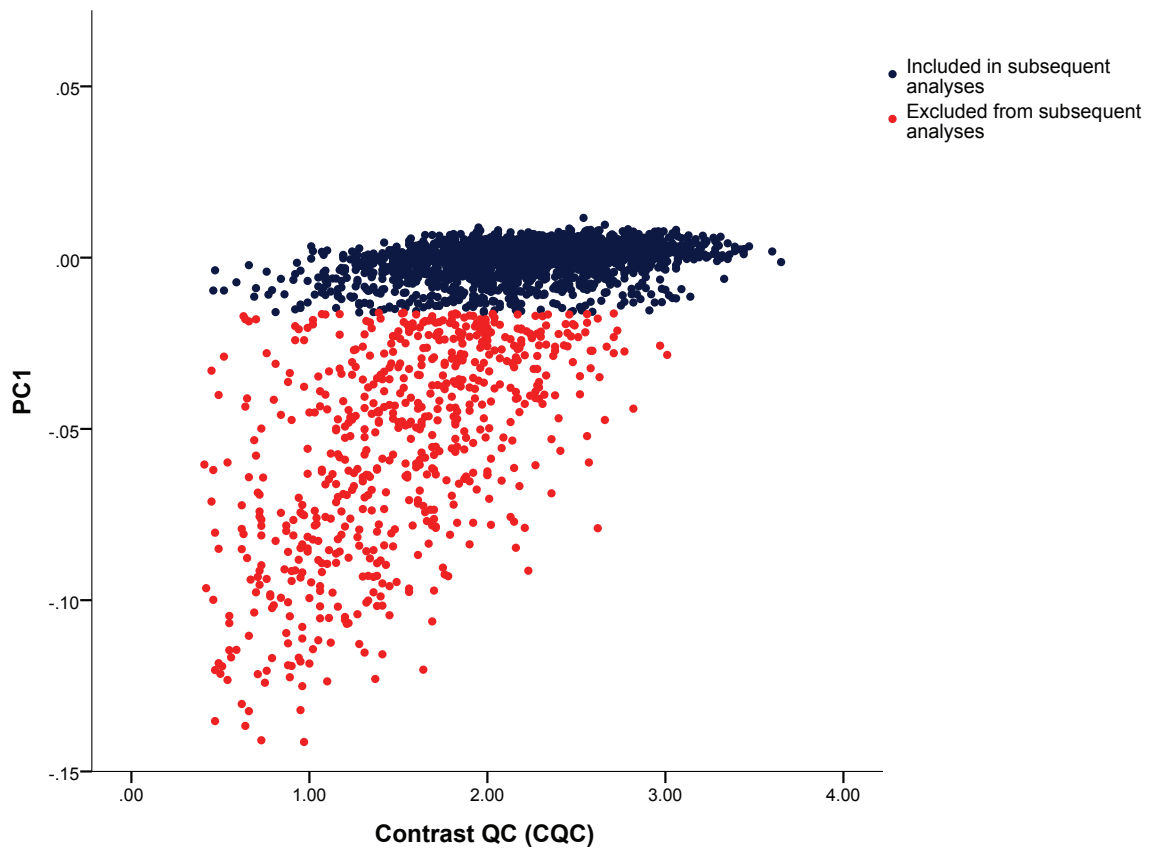

Supplement: ejhg201348x7.pdf [file ejhg201348x7.pdf]
